# Supplementary material
Source: PubMed Central journal article supplement (PMC2768546)
Supplement: NIHMS108974-supplement-1.pdf [file NIHMS108974-supplement-1.pdf]

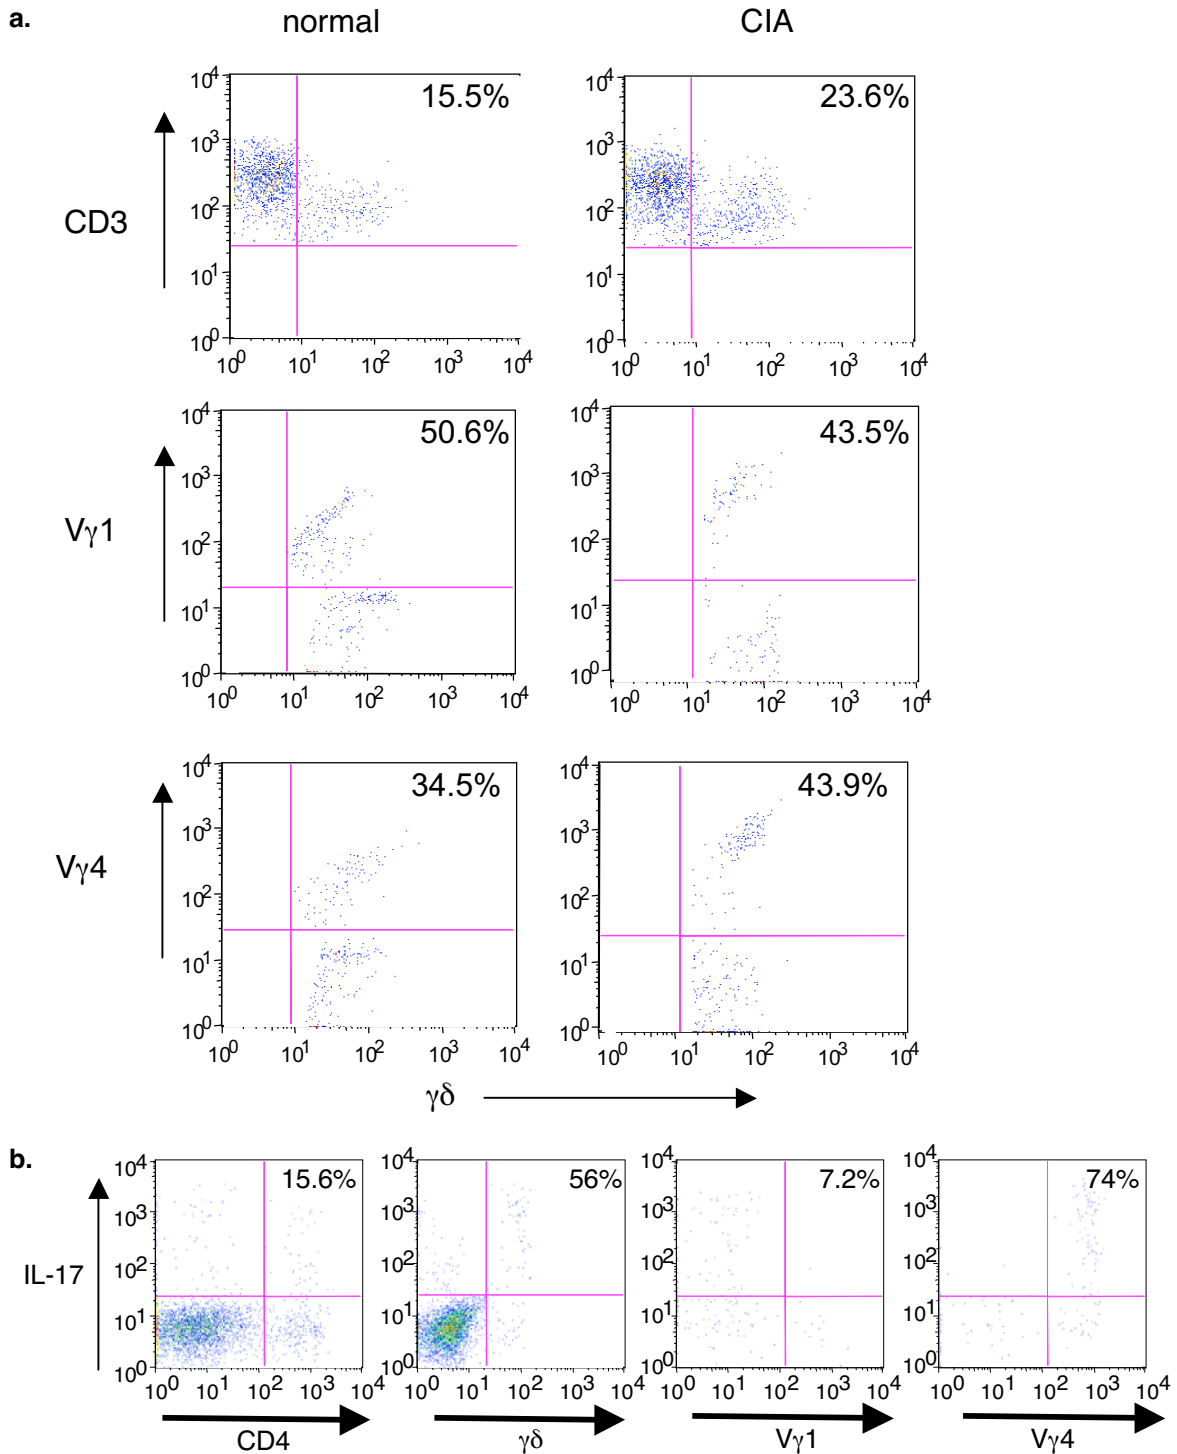

Supplementary Fig. 1. (a)  $\gamma\delta$  T cells are present in the normal joint and increased in diseased joints. DBA/1 lac J mice were injected with collagen/CFA and diseased joints taken on day 35. Joints were stained and compared with joints taken from mice that had not received any injections. Only diseased joints from collagen injected mice were analyzed. (b) Intracellular cytokine staining on day 26 for IL-17 in cells from the joints of collagen/CFA injected mice.

| <u>V<math>\gamma</math>4</u> | <u>N</u> | <u>J<math>\gamma</math>1</u> |                     |
|------------------------------|----------|------------------------------|---------------------|
| tgttcctacgg                  | tctat    | atagctcaggt                  | 1/23                |
| C S Y G                      | L        | Y S S G                      |                     |
| tgttcctacgg                  | ccttt    | atagctcaggt                  | 1/23                |
| C S Y G                      | L        | Y S S G                      |                     |
| tgttcctacgg                  | cttat    | atagctcaggt                  | 4/23                |
| C S Y G                      | L        | Y S S G                      |                     |
| tgttcctacgg                  | ct       | atagctcaggt                  | 5/23 germline (22%) |
| C S Y G                      |          | Y S S G                      |                     |
| tgttcctacgg                  | cccat    | atagctcaggt                  |                     |
| C S Y G                      | P        | Y S S G                      |                     |
| tgttcc                       | ggg      | agctcaggt                    |                     |
| C S                          | G        | S S G                        |                     |
| tgttcctacgg                  | cggat    | atagctcaggt                  |                     |
| C S Y G                      | G        | Y S S G                      |                     |
| tgttcctacgg                  | caagagg  | agctcaggt                    |                     |
| C S Y G                      | K R      | S S G                        |                     |
| tgttcctacgg                  | c        | agctcaggt                    |                     |
| C S Y G                      |          | S S G                        |                     |
| tgttcctacgg                  | cgaat    | atagctcaggt                  |                     |
| C S Y G                      | E        | Y S S G                      |                     |
| tgttcctacgg                  | ggtat    | atagctcaggt                  |                     |
| C S Y G                      | V        | Y S S G                      |                     |
| tgttcctacgg                  | ga       | atagctcaggt                  |                     |
| C S Y G                      |          | N S S G                      |                     |
| tgttcctacgg                  | ctacg    | gctcaggt                     |                     |
| C S Y G                      | Y        | G S G                        |                     |
| tgttcctacgg                  | gg       | atagctcaggt                  |                     |
| C S Y G                      |          | D S S G                      |                     |
| tgttcctacgg                  | cgcatt   | atagctcaggt                  |                     |
| C S Y G                      | A        | Y S S G                      |                     |
| tgttcctacgg                  | ctcct    | atagctcaggt                  |                     |
| C S Y G                      | S        | Y S S G                      |                     |

Supplementary Fig. 2. V $\gamma$ 4 sequences in the lymph nodes of naive DBA/1 mice

| <u>Vδ4</u>  | <u>N/Dδ1/N</u>      | <u>Dδ2</u>        | <u>N</u>  | <u>Jδ</u>   |
|-------------|---------------------|-------------------|-----------|-------------|
| ctcatggagcg | cggt                | atcggagggatacagag |           | ctaccgacaaa |
| L M E R     | G                   | I G G I R         |           | A T D K     |
| ctcatggagcg | gggg                | atcggagggatac     | aggctcggg | ccgacaaa    |
| L M E R     | G                   | I G G I           | Q A R     | A D K       |
| ctcatggagcg | cgaagg              | cggagggatacag     | tg        | ctaccgacaaa |
| L M E R     | E G                 | G G I R           |           | A T D K     |
| ctcatggagcg | cgaatggtggcaccgatcg | atcggagggata      | g         | ctaccgacaaa |
| L M E R     | E W W H R S         | I G G I           |           | A T D K     |
| ctcatggagcg | cctgcgcccgggt       | atcggaggg         | taccctctg | ctaccgacaaa |
| L M E R     | L R P G             | I G G             | Y P S     | A T D K     |
| ctcatggagcg | cgagacat            | atcggagggat       | ccag      | ctaccgacaaa |
| L M E R     | E T                 | Y R R D           | P         | A T D K     |
| ctcatggagcg | cgctgcggcat         | atcggagggat       | aaa       | accgacaaa   |
| L M E R     | A A A               | Y R R D           | K         | T D K       |
| ctcatggagcg | tgcatatg            | tcggaggg          | g         | taccgacaaa  |
| L M E R     | G I C               | R R               | G         | T D K       |
| ctcatggagcg | cggtatatg           | tcggagggat        | g         | ctaccgacaaa |
| L M E R     | G I C               | R R D             |           | A T D K     |
| ctcatggagcg | cgttctc             | cgg               | g         | ctaccgacaaa |
| L M E R     | V L                 | R                 |           | A T D K     |
| ctcatggagcg | cgcc                | cggagggatacag     | cgg       | accgacaaa   |
| L M E R     | A                   | R R D T           | R         | T D K       |
| ctcatggagc  | tcgggccatca         | gagggatacagag     | t         | ccgacaaa    |
| L M E       | L G P S             | E G Y E           |           | S D K       |
| ctcatggagcg | gct                 | atcggagggatacagag | ctg       | accgacaaa   |
| L M E R     | L                   | S E G Y E         | L         | T D K       |

Supplementary Fig. 3. Vδ4 sequences in the lymph nodes of naive DBA/1 mice
